# Supplementary figures and images for: Independent prognostic value of HIF-1α expression in radiofrequency ablation of lung cancer
Source: PubMed Central journal article supplement — Oncol Lett. 2019 Nov 21;19(1):849–57. doi: 10.3892/ol.2019.11130 (PMC6924154; doi:10.3892/ol.2019.11130), 2019-11-21

Figure S1. Flow cytometric analysis of CD4<sup>+</sup>/CD8<sup>+</sup> in peripheral blood of patients.

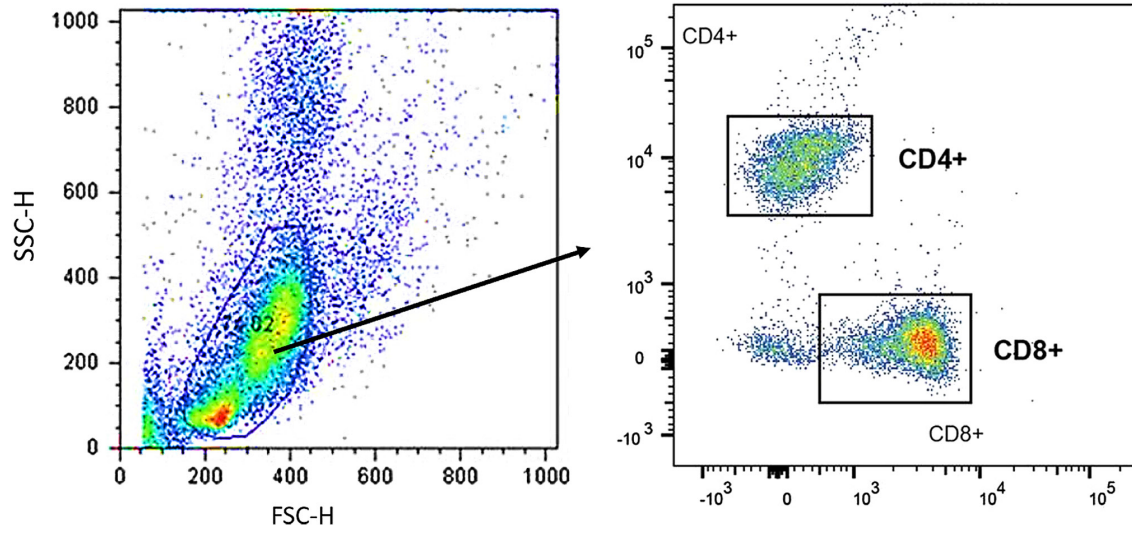

Supplement: Supplementary_Data.pdf [file Supplementary_Data.pdf]
